# Supplementary material for: Care for Joy: Evaluation of a Humor Intervention and Its Effects on Stress, Flow Experience, Work Enjoyment, and Meaningfulness of Work
Source: PubMed Central journal article supplement (PMC8283127; doi:10.3389/fpubh.2021.667821), 2021-07-02
Supplement: Table_1.pdf [file Table_1.pdf]

## **Care for joy: Evaluation of a humor intervention and its effects on stress, flow experience, work enjoyment and meaningfulness of work**

### **Supplementary material**

Marek Bartzik<sup>1</sup>, Andreas Bentrup<sup>2</sup>, Susanne Hill<sup>2</sup>, Maria Bley<sup>2</sup>, Eckart von Hirschhausen<sup>2</sup>, Gerrit Krause<sup>3</sup>, Peter Ahaus<sup>3</sup>, Angelika Dahl-Dichmann<sup>4</sup> & Corinna Peifer<sup>1</sup>

<sup>1</sup> University of Lübeck, Department of Psychology, Research Group Work and Health, Lübeck, Germany

<sup>2</sup> Stiftung Humor Hilft Heilen (Foundation Humour Helps Healing), Bonn, Germany

<sup>3</sup> Alexianer GmbH, Münster, Germany

<sup>4</sup> Alexianer GmbH, Berlin, Germany

**Table S1****Flow Frequency Scale (Bartzik and Peifer, in preparation)**

| <b>Instruction</b>                                                                                                                                                                                                                                                |                                                                                                                                                                        |
|-------------------------------------------------------------------------------------------------------------------------------------------------------------------------------------------------------------------------------------------------------------------|------------------------------------------------------------------------------------------------------------------------------------------------------------------------|
| <p>Below you will find a number of questions <b>about your daily work</b>. Please rate “how often” or “rarely” you have had the experience in the <b>last two weeks</b>.</p> <p><b>How often have you experienced in the last two weeks at work, that ...</b></p> |                                                                                                                                                                        |
| English items                                                                                                                                                                                                                                                     | German items                                                                                                                                                           |
| 1. ... you had clear goals in mind.                                                                                                                                                                                                                               | 1. ... Sie klare Ziele vor Augen hatten.                                                                                                                               |
| 2. ... you received the right amount of feedback.                                                                                                                                                                                                                 | 2. ... Sie das richtige Maß an Feedback erhielten.                                                                                                                     |
| 3. ... you were optimally challenged.                                                                                                                                                                                                                             | 3. ... Sie optimal gefordert wurden.                                                                                                                                   |
| 4. ... you were completely focused on what you were doing.                                                                                                                                                                                                        | 4. ... Sie vollständig auf Ihr Tun konzentriert waren.                                                                                                                 |
| 5. ... your actions were fluent and smooth.                                                                                                                                                                                                                       | 5. ... Ihr Tun flüssig und glatt verlief.                                                                                                                              |
| 6. ... one step automatically resulted in the next.                                                                                                                                                                                                               | 6. ... ein Schritt ganz automatisch den nächsten ergab.                                                                                                                |
| 7. ... you had everything under control.                                                                                                                                                                                                                          | 7. ... Sie alles unter Kontrolle hatten.                                                                                                                               |
| 8. ... you were surprised how quickly time passed.                                                                                                                                                                                                                | 8. ... Sie überrascht waren, wie schnell die Zeit verging.                                                                                                             |
| 9. ... you were completely absorbed in an activity.                                                                                                                                                                                                               | 9. ... Sie ganz in einer Tätigkeit aufgingen.                                                                                                                          |
| 10. ... you became one with an activity.                                                                                                                                                                                                                          | 10. ... Sie mit einer Tätigkeit eins geworden sind.                                                                                                                    |
| 11. ... you "merged" with an activity.                                                                                                                                                                                                                            | 11. ... Sie mit einer Tätigkeit „verschmolzen“ sind.                                                                                                                   |
| <b>Scale</b>                                                                                                                                                                                                                                                      |                                                                                                                                                                        |
| (1) = “ <i>Never</i> ”, (2) = “ <i>Almost never</i> ”,<br>(3) = “ <i>Sometimes</i> ”, (4) = “ <i>Often</i> ”,<br>(5) = “ <i>Very Often</i> ”, (6) = “ <i>(Almost) always</i> ”                                                                                    | (1) = „ <i>Nie</i> “, (2) = „ <i>Fast nie</i> “,<br>(3) = „ <i>Manchmal</i> “, (4) = „ <i>Häufig</i> “,<br>(5) = „ <i>Sehr häufig</i> “, (6) = „ <i>(Fast) immer</i> “ |

**Table S2****Perceived meaningfulness of work (self-created items)**

| <b>Instruction</b>                                            |                                                                       |
|---------------------------------------------------------------|-----------------------------------------------------------------------|
| Please mark how strongly you agree with the statements below. |                                                                       |
| <b>English items</b>                                          | <b>German items</b>                                                   |
| 1. My work is meaningful.                                     | 1. Meine Arbeit ist sinnvoll.                                         |
| 2. The work I do is important for me.                         | 2. Die Arbeit, die ich tue, ist wichtig für mich.                     |
| 3. My work fulfils me.                                        | 3. Meine Arbeit erfüllt mich.                                         |
| 4. My work is meaningful to others.                           | 4. Meine Arbeit ist bedeutsam für andere.                             |
| 5. My work is meaningful to society.                          | 5. Meine Arbeit ist bedeutsam für die Gesellschaft.                   |
| 6. My work is appreciated by patients and relatives.          | 6. Meine Arbeit wird von den Patienten und Angehörigen wertgeschätzt. |
| 7. My work is appreciated by society.                         | 7. Meine Arbeit wird von der Gesellschaft wertgeschätzt.              |
| <b>Scale</b>                                                  |                                                                       |
| (1) = "do not agree" to (6) = "fully agree"                   | (1) = „stimme nicht zu“ bis (6) = „stimme voll und ganz zu“           |
